# Supplementary material
Source: PubMed Central journal article supplement (PMC524445)
Supplement: pnas_101_43_15380__1.pdf [file pnas_101_43_15380__1.pdf]

| Alignment position | Yeast EF-1alpha residues | Delta-SR (Type I FD sites are shown in red) | Type II FD sites | Putative binding sites |         |        | Overlap between the putative binding sites and those with Type I FD sites | Overlap between the putative binding sites and those with Type II FD sites |
|--------------------|--------------------------|---------------------------------------------|------------------|------------------------|---------|--------|---------------------------------------------------------------------------|----------------------------------------------------------------------------|
|                    |                          |                                             |                  | EF-1beta               | aa-tRNA | GD(T)P |                                                                           |                                                                            |
|                    | 2                        | G                                           |                  |                        |         |        |                                                                           |                                                                            |
|                    | 3                        | K                                           |                  |                        |         |        |                                                                           |                                                                            |
|                    | 4                        | E                                           |                  |                        |         |        |                                                                           |                                                                            |
|                    | 5                        | K                                           |                  |                        |         |        |                                                                           |                                                                            |
|                    | 6                        | S                                           |                  |                        |         |        |                                                                           |                                                                            |
|                    | 7                        | H                                           |                  |                        |         |        |                                                                           |                                                                            |
|                    | 8                        | I                                           |                  |                        |         |        |                                                                           |                                                                            |
|                    | 9                        | N                                           |                  |                        |         |        |                                                                           |                                                                            |
|                    | 10                       | V                                           |                  |                        |         |        |                                                                           |                                                                            |
|                    | 11                       | V                                           |                  |                        |         |        |                                                                           |                                                                            |
|                    | 12                       | V                                           |                  |                        |         |        |                                                                           |                                                                            |
|                    | 13                       | I                                           |                  |                        |         |        |                                                                           |                                                                            |
|                    | 14                       | G                                           |                  |                        |         |        |                                                                           |                                                                            |
|                    | 15                       | H                                           |                  |                        |         |        |                                                                           |                                                                            |
|                    | 16                       | V                                           |                  |                        |         | X      |                                                                           |                                                                            |
|                    | 17                       | D                                           |                  |                        |         | X      |                                                                           |                                                                            |
|                    | 18                       | S                                           |                  |                        |         |        |                                                                           |                                                                            |
|                    | 19                       | G                                           |                  |                        |         | X      |                                                                           |                                                                            |
|                    | 20                       | K                                           |                  |                        |         |        |                                                                           |                                                                            |
| 1                  | 21                       | S                                           | -0.015177        |                        |         | X      |                                                                           |                                                                            |
| 2                  | 22                       | T                                           | -0.027513        |                        |         | X      |                                                                           |                                                                            |
| 3                  | 23                       | T                                           | 0.086173         |                        |         |        |                                                                           |                                                                            |
| 4                  | 24                       | T                                           | -0.027513        |                        |         |        |                                                                           |                                                                            |
| 5                  | 25                       | G                                           | -0.107283        |                        |         |        |                                                                           |                                                                            |
| 6                  | 26                       | H                                           | -0.598381        |                        |         |        |                                                                           |                                                                            |
| 7                  | 27                       | L                                           | -0.047132        |                        |         |        |                                                                           |                                                                            |
| 8                  | 28                       | I                                           | -0.676279        |                        |         |        |                                                                           |                                                                            |
| 9                  | 29                       | Y                                           | -0.122331        | +                      |         |        |                                                                           |                                                                            |
| 10                 | 30                       | K                                           | -0.025046        | +                      |         |        |                                                                           |                                                                            |
| 11                 | 31                       | C                                           | 3.227086         | +                      |         |        |                                                                           |                                                                            |
| 12                 | 32                       | G                                           | -0.107283        |                        |         |        |                                                                           |                                                                            |
| 13                 | 33                       | G                                           | -0.61297         |                        |         |        |                                                                           |                                                                            |
| 14                 | 34                       | I                                           | -0.552964        |                        |         |        |                                                                           |                                                                            |
| 15                 | 35                       | D                                           | -0.644147        |                        |         |        |                                                                           |                                                                            |
| 16                 | 36                       | K                                           | 0.813447         |                        |         |        |                                                                           |                                                                            |
| 17                 | 37                       | R                                           | -0.071878        |                        |         |        |                                                                           |                                                                            |
| 18                 | 38                       | T                                           | 0.4419           |                        |         |        |                                                                           |                                                                            |
| 19                 | 39                       | I                                           | -1.108522        |                        |         |        |                                                                           |                                                                            |
| 20                 | 40                       | E                                           | -0.568921        |                        |         |        |                                                                           |                                                                            |
| 21                 | 41                       | K                                           | 0.374332         |                        |         |        |                                                                           |                                                                            |
| 22                 | 42                       | F                                           | 1.03196          |                        |         |        |                                                                           |                                                                            |
| 23                 | 43                       | E                                           | -0.636316        |                        |         |        |                                                                           |                                                                            |
| 24                 | 44                       | K                                           | -0.888453        |                        |         |        |                                                                           |                                                                            |
| 25                 | 45                       | E                                           | -0.467679        |                        |         |        |                                                                           |                                                                            |
| 26                 | 46                       | A                                           | -0.024159        |                        |         |        |                                                                           |                                                                            |
| 27                 | 47                       | A                                           | 0.259676         |                        |         |        |                                                                           |                                                                            |
| 28                 | 48                       | E                                           | -0.921854        |                        |         |        |                                                                           |                                                                            |
| 29                 | 49                       | L                                           | 0.510244         |                        |         |        |                                                                           |                                                                            |
| 30                 | 50                       | G                                           | -0.576983        |                        |         |        |                                                                           |                                                                            |
| 31                 | 51                       | K                                           | -0.089173        |                        |         |        |                                                                           |                                                                            |
| 32                 | 52                       | G                                           | 0.306168         |                        |         |        |                                                                           |                                                                            |
| 33                 | 53                       | S                                           | -0.015177        |                        |         |        |                                                                           |                                                                            |
| 34                 | 54                       | F                                           | -0.12264         |                        |         |        |                                                                           |                                                                            |
| 35                 | 55                       | K                                           | -0.024731        | +                      |         |        |                                                                           |                                                                            |
| 36                 | 56                       | Y                                           | -0.122331        | +                      |         |        |                                                                           |                                                                            |
| 37                 | 57                       | A                                           | -0.028244        |                        |         |        |                                                                           |                                                                            |
| 38                 | 58                       | W                                           | 0.466597         |                        |         |        |                                                                           |                                                                            |
| 39                 | 59                       | V                                           | -0.617195        |                        |         |        |                                                                           |                                                                            |
| 40                 | 60                       | L                                           | 0.949555         |                        |         |        |                                                                           |                                                                            |
| 41                 | 61                       | D                                           | -0.024358        |                        |         |        |                                                                           |                                                                            |
| 42                 | 62                       | K                                           | 0.151256         |                        |         |        |                                                                           |                                                                            |
| 43                 | 63                       | L                                           | -0.535457        |                        |         | X      |                                                                           |                                                                            |
| 44                 | 64                       | K                                           | -0.089173        |                        | X       | X      |                                                                           |                                                                            |
| 45                 | 65                       | A                                           | -0.019388        |                        |         | X      |                                                                           |                                                                            |
| 46                 | 66                       | E                                           | -0.028518        |                        |         | X      |                                                                           |                                                                            |
| 47                 | 67                       | R                                           | -0.089891        |                        | X       |        |                                                                           |                                                                            |
| 48                 | 68                       | E                                           | -0.028518        |                        | X       |        |                                                                           |                                                                            |
| 49                 | 69                       | R                                           | -0.071878        |                        | X       |        |                                                                           |                                                                            |
| 50                 | 70                       | G                                           | -0.045586        |                        |         |        |                                                                           |                                                                            |
| 51                 | 71                       | I                                           | -0.05593         | +                      |         |        |                                                                           |                                                                            |
| 52                 | 72                       | T                                           | -0.027513        |                        | X       |        |                                                                           |                                                                            |
| 53                 | 73                       | I                                           | -0.029304        |                        | X       |        |                                                                           |                                                                            |
| 54                 | 74                       | D                                           | -0.663211        |                        |         | X      |                                                                           |                                                                            |
| 55                 | 75                       | I                                           | -0.167362        | +                      | X       | X      |                                                                           |                                                                            |
| 56                 | 76                       | A                                           | 0.895891         |                        |         |        |                                                                           | X                                                                          |
| 57                 | 77                       | L                                           | -0.015275        | +                      | X       |        |                                                                           | X                                                                          |
| 58                 | 78                       | W                                           | -0.032343        | +                      | X       | X      |                                                                           | X                                                                          |
| 59                 | 79                       | K                                           | 0.083933         |                        |         |        |                                                                           |                                                                            |
| 60                 | 80                       | F                                           | -0.12264         |                        |         |        |                                                                           |                                                                            |
| 61                 | 81                       | E                                           | -0.759407        |                        |         |        |                                                                           |                                                                            |
| 62                 | 82                       | T                                           | 0.399523         |                        |         |        |                                                                           |                                                                            |
| 63                 | 83                       | P                                           | 0.722365         |                        |         |        |                                                                           |                                                                            |
| 64                 | 84                       | K                                           | -2.123024        |                        |         |        |                                                                           |                                                                            |
| 65                 | 85                       | Y                                           | -0.258644        |                        |         |        |                                                                           |                                                                            |
| 66                 | 86                       | Q                                           | 3.718334         | +                      |         |        |                                                                           |                                                                            |
| 67                 | 87                       | V                                           | 2.505348         | +                      |         |        |                                                                           |                                                                            |
| 68                 | 88                       | T                                           | -0.027513        |                        |         |        |                                                                           |                                                                            |
| 69                 | 89                       | V                                           | -0.44818         |                        |         |        |                                                                           |                                                                            |
| 70                 | 90                       | I                                           | -0.029304        |                        | X       |        |                                                                           |                                                                            |
| 71                 | 91                       | D                                           | -0.024358        |                        | X       |        |                                                                           |                                                                            |
| 72                 | 92                       | A                                           | -0.028244        |                        |         |        |                                                                           |                                                                            |

|     |     |   |           |   |   |   |
|-----|-----|---|-----------|---|---|---|
| 73  | 93  | P | -0.085116 |   | X |   |
| 74  | 94  | G | -0.107283 |   |   |   |
| 75  | 95  | H | -0.068574 |   | X |   |
| 76  | 96  | R | -0.47602  |   | X |   |
| 77  | 97  | D | -0.024358 |   | X | X |
| 78  | 98  | F | -0.12264  |   | X | X |
| 79  | 99  | I | -0.029304 |   |   |   |
| 80  | 100 | K | -0.089173 |   | X | X |
| 81  | 101 | N | -0.008436 |   | X | X |
| 82  | 102 | M | -0.029376 |   |   |   |
| 83  | 103 | I | -0.029304 |   |   |   |
| 84  | 104 | T | -0.630731 |   |   |   |
| 85  | 105 | G | -0.107283 |   |   |   |
| 86  | 106 | T | -0.028244 | + |   |   |
| 87  | 107 | S | -0.651219 |   |   |   |
| 88  | 108 | Q | -0.030721 |   |   |   |
| 89  | 109 | A | -0.028244 |   |   |   |
| 90  | 110 | D | -0.024358 |   |   |   |
| 91  | 111 | C | 3.450082  | + |   |   |
| 92  | 112 | A | -0.524857 |   |   |   |
| 93  | 113 | I | 0.7786    |   |   |   |
| 94  | 114 | L | -0.436436 |   |   |   |
| 95  | 115 | I | 0.983314  |   |   |   |
| 96  | 116 | I | 0.911959  |   |   |   |
| 97  | 117 | A | 0.875959  |   |   |   |
| 98  | 118 | G | 0.527254  |   |   |   |
| 99  | 119 | G | 2.736498  |   |   |   |
| 100 | 120 | V | 1.054641  |   |   |   |
| 101 | 121 | G | -0.075592 |   |   |   |
|     | 122 | E |           |   |   |   |
|     | 123 | F |           |   |   |   |
|     | 124 | E |           |   |   |   |
|     | 125 | A |           |   |   |   |
|     | 126 | G |           |   |   |   |
|     | 127 | I |           |   |   |   |
|     | 128 | S |           |   |   |   |
|     | 129 | K |           |   |   |   |
|     | 130 | D |           |   |   |   |
|     | 131 | G |           |   |   |   |
| 102 | 132 | Q | -0.030721 |   |   |   |
| 103 | 133 | T | -0.50114  |   |   |   |
| 104 | 134 | R | 0.136162  |   |   |   |
| 105 | 135 | E | -0.622399 |   |   |   |
| 106 | 136 | H | -0.068574 |   |   |   |
| 107 | 137 | A | -0.506217 |   |   |   |
| 108 | 138 | L | -1.003494 |   |   |   |
| 109 | 139 | L | -0.127859 |   |   |   |
| 110 | 140 | A | -0.634227 |   |   |   |
| 111 | 141 | F | 3.334171  |   |   |   |
| 112 | 142 | T | -0.11495  | + |   |   |
| 113 | 143 | L | -0.056631 |   |   |   |
| 114 | 144 | G | -0.107283 |   |   |   |
| 115 | 145 | V | -0.476134 |   |   |   |
| 116 | 146 | R | 0.388526  |   |   |   |
| 117 | 147 | Q | -0.022147 |   |   |   |
| 118 | 148 | L | -0.487633 |   |   |   |
| 119 | 149 | I | 0.121764  |   |   |   |
| 120 | 150 | V | -0.362902 |   |   |   |
| 121 | 151 | A | 2.134926  |   |   |   |
| 122 | 152 | V | 2.076813  |   |   |   |
| 123 | 153 | N | -0.008436 |   |   | X |
| 124 | 154 | K | -0.089173 |   |   | X |
| 125 | 155 | M | 0.057626  |   |   |   |
| 126 | 156 | D | -0.024358 |   |   | X |
|     | 157 | S |           |   |   |   |
|     | 158 | V |           |   |   |   |
| 127 | 159 | K | 0.276295  |   |   |   |
| 128 | 160 | W | 0.789516  |   |   |   |
| 129 | 161 | D | -4.127403 |   |   |   |
| 130 | 162 | E | 0.142353  |   |   |   |
| 131 | 163 | S | 0.894982  |   |   |   |
| 132 | 164 | R | -0.071878 |   |   |   |
| 133 | 165 | F | 0.764791  |   |   |   |
| 134 | 166 | Q | 0.328234  |   |   |   |
| 135 | 167 | E | -0.023161 |   |   |   |
| 136 | 168 | I | -0.630431 |   |   |   |
| 137 | 169 | V | 1.236754  |   |   |   |
| 138 | 170 | K | 0.261386  |   |   |   |
| 139 | 171 | E | -0.624229 |   |   |   |
| 140 | 172 | T | 1.064134  | + |   |   |
| 141 | 173 | S | 0.222595  |   |   |   |
| 142 | 174 | N | 0.562053  | + |   |   |
| 143 | 175 | F | 3.475276  | + |   |   |
| 144 | 176 | I | 0.805157  |   |   |   |
| 145 | 177 | K | -1.905324 |   |   |   |
| 146 | 178 | K | -0.333202 |   |   |   |
| 147 | 179 | V | 0.156665  |   |   |   |
| 148 | 180 | G | -0.107283 |   |   |   |
| 149 | 181 | Y | 0.810746  |   |   |   |
|     | 182 | N |           |   |   |   |
|     | 183 | P |           |   |   |   |
|     | 184 | K |           |   |   |   |
|     | 185 | T |           |   |   |   |
| 150 | 186 | V | 0.518694  |   |   |   |
| 151 | 187 | P | 3.663507  | + |   |   |
| 152 | 188 | F | 0.436446  |   |   |   |
| 153 | 189 | V | 0.021707  |   |   |   |
| 154 | 190 | P | -0.087824 |   |   |   |
| 155 | 191 | I | 0.056016  |   |   |   |

|     |     |   |           |   |   |  |   |   |
|-----|-----|---|-----------|---|---|--|---|---|
| 156 | 192 | S | -0.015177 |   | X |  | X |   |
| 157 | 193 | G | -0.107283 |   |   |  |   |   |
| 158 | 194 | W | 1.172092  |   | X |  | X |   |
| 159 | 195 | N | 0.370351  |   |   |  |   |   |
| 160 | 196 | G | -0.107283 |   |   |  |   |   |
| 161 | 197 | D | -0.024358 |   |   |  |   |   |
| 162 | 198 | N | -0.008436 |   |   |  |   |   |
| 163 | 199 | M | 0.455771  |   |   |  |   |   |
|     | 200 | I |           |   |   |  |   |   |
|     | 201 | E |           |   |   |  |   |   |
|     | 202 | A |           |   |   |  |   |   |
|     | 203 | T |           |   |   |  |   |   |
|     | 204 | T |           |   |   |  |   |   |
|     | 205 | N |           |   |   |  |   |   |
|     | 206 | A |           |   |   |  |   |   |
| 164 | 207 | P | 0.064077  |   |   |  |   |   |
| 165 | 208 | W | -0.165224 |   |   |  |   |   |
| 166 | 209 | Y | -3.268376 |   |   |  |   |   |
| 167 | 210 | K | -2.95066  |   |   |  |   |   |
| 168 | 211 | G | -0.860853 |   |   |  |   |   |
|     | 212 | W |           |   |   |  |   |   |
|     | 213 | E |           |   |   |  |   |   |
|     | 214 | K |           |   |   |  |   |   |
|     | 215 | E |           |   |   |  |   |   |
|     | 216 | T |           |   |   |  |   |   |
|     | 217 | K |           |   |   |  |   |   |
|     | 218 | A |           |   |   |  |   |   |
|     | 219 | G |           |   |   |  |   |   |
|     | 220 | V |           |   |   |  |   |   |
|     | 221 | V |           |   |   |  |   |   |
|     | 222 | K |           |   |   |  |   |   |
|     | 223 | G |           |   |   |  |   |   |
| 169 | 224 | K | 0.171215  |   |   |  |   |   |
| 170 | 225 | T | 0.267698  |   |   |  |   |   |
| 171 | 226 | L | -0.595295 |   |   |  |   |   |
| 172 | 227 | L | 0.080762  | + |   |  |   |   |
| 173 | 228 | E | 0.555581  |   |   |  |   |   |
| 174 | 229 | A | -0.577716 |   |   |  |   |   |
| 175 | 230 | I | 0.21366   |   |   |  |   |   |
| 176 | 231 | D | -0.644788 |   |   |  |   |   |
| 177 | 232 | A | 0.286355  |   |   |  |   |   |
| 178 | 233 | I | 0.289824  |   |   |  |   |   |
| 179 | 234 | E | 0.388698  |   |   |  |   |   |
| 180 | 235 | Q | 0.214155  |   |   |  |   |   |
| 181 | 236 | P | -0.611291 |   |   |  |   |   |
| 182 | 237 | S | 0.195509  |   |   |  |   |   |
| 183 | 238 | R | -0.071878 |   |   |  |   |   |
| 184 | 239 | P | -1.524781 | + |   |  |   |   |
| 185 | 240 | T | 0.274143  |   |   |  |   |   |
| 186 | 241 | D | -0.679769 |   |   |  |   |   |
| 187 | 242 | K | -0.61355  |   |   |  |   |   |
| 188 | 243 | P | -0.461746 |   |   |  |   |   |
| 189 | 244 | L | -0.652366 |   |   |  |   |   |
| 190 | 245 | R | -0.071878 |   |   |  |   |   |
| 191 | 246 | L | -0.667207 |   |   |  |   |   |
| 192 | 247 | P | -0.085116 |   |   |  |   |   |
| 193 | 248 | L | -0.45862  |   |   |  |   |   |
| 194 | 249 | Q | -0.01352  | + | X |  | X | X |
| 195 | 250 | D | -0.225391 |   |   |  |   |   |
| 196 | 251 | V | -0.631808 |   |   |  |   |   |
|     | 252 | Y |           |   | X |  | X |   |
| 197 | 253 | K | -0.089175 |   | X |  | X |   |
| 198 | 254 | I | -0.620069 |   | X |  | X | X |
|     | 255 | G |           |   |   |  |   |   |
|     | 256 | G |           |   |   |  |   |   |
| 199 | 257 | I | -0.486676 |   | X |  | X |   |
| 200 | 258 | G | -0.107283 |   |   |  |   |   |
| 201 | 259 | T | -0.624373 |   |   |  |   |   |
| 202 | 260 | V | -0.05815  |   | X |  | X |   |
| 203 | 261 | P | -0.605771 |   |   |  |   |   |
| 204 | 262 | V | -0.49633  |   |   |  | X |   |
| 205 | 263 | G | -0.107283 |   |   |  |   |   |
| 206 | 264 | R | -0.071878 |   |   |  |   |   |
| 207 | 265 | V | -0.541548 |   |   |  |   |   |
| 208 | 266 | E | -0.028518 |   |   |  |   |   |
| 209 | 267 | T | 0.021224  |   |   |  |   |   |
| 210 | 268 | G | -0.107283 |   |   |  |   |   |
| 211 | 269 | V | -1.115246 |   |   |  |   |   |
| 212 | 270 | I | 0.510834  |   |   |  |   |   |
| 213 | 271 | K | 0.418697  |   |   |  |   |   |
| 214 | 272 | P | -0.022186 |   |   |  |   |   |
| 215 | 273 | G | -1.560538 |   |   |  |   |   |
| 216 | 274 | M | -1.714787 |   |   |  |   |   |
| 217 | 275 | V | 0.968933  |   |   |  |   |   |
| 218 | 276 | V | 0.006051  |   |   |  |   |   |
| 219 | 277 | T | 0.179155  |   |   |  |   |   |
| 220 | 278 | F | -0.6328   |   |   |  |   |   |
| 221 | 279 | A | -1.865229 |   |   |  |   |   |
| 222 | 280 | P | -0.611291 |   |   |  |   |   |
| 223 | 281 | A | 3.704163  | + |   |  |   |   |
| 224 | 282 | G | 0.503403  |   |   |  |   |   |
| 225 | 283 | V | 3.647831  | + |   |  |   |   |
| 226 | 284 | T | 0.248187  |   |   |  |   |   |
| 227 | 285 | T | -0.667261 |   |   |  |   |   |
| 228 | 286 | E | 1.192974  |   |   |  |   |   |
|     | 287 | V |           |   |   |  |   |   |
|     | 288 | K |           |   |   |  |   |   |
|     | 289 | S |           |   | X |  | X |   |
|     | 290 | V |           |   |   |  | X |   |

|     |     |   |           |   |   |   |   |
|-----|-----|---|-----------|---|---|---|---|
| 291 | E   |   |           | X |   | X |   |
| 292 | M   |   |           |   |   | X |   |
| 293 | H   |   |           | X |   | X |   |
| 294 | H   |   |           | X |   | X |   |
| 295 | E   |   |           |   |   |   |   |
| 296 | Q   |   |           |   |   |   |   |
| 297 | L   |   |           |   |   |   |   |
| 298 | E   |   |           |   |   |   |   |
| 229 | 299 | Q | -4.705964 |   |   |   |   |
| 230 | 300 | G | -0.019048 |   |   |   |   |
| 231 | 301 | V | 1.149925  |   |   |   |   |
| 232 | 302 | P | -0.648355 |   |   |   |   |
| 233 | 303 | G | -0.107283 |   |   |   |   |
| 234 | 304 | D | -0.007498 |   |   |   |   |
| 235 | 305 | N | -0.008436 | X |   | X |   |
| 236 | 306 | V | 0.427853  |   |   | X |   |
| 237 | 307 | G | -0.107283 |   |   | X |   |
| 238 | 308 | F | -0.669027 | X |   | X |   |
| 239 | 309 | N | -0.652586 | X |   | X | X |
| 240 | 310 | V | 0.089824  |   |   |   |   |
| 241 | 311 | K | -0.082261 |   |   |   |   |
| 242 | 312 | N | -0.214121 |   |   |   |   |
| 243 | 313 | V | 0.399429  |   |   |   |   |
| 244 | 314 | S | -0.665816 |   |   |   |   |
| 245 | 315 | V | 0.721849  |   |   | X |   |
| 246 | 316 | K | -0.426612 |   |   |   |   |
| 247 | 317 | E | 0.470513  |   |   |   |   |
| 248 | 318 | I | 1.024085  |   |   |   |   |
| 249 | 319 | R | 1.212496  |   |   |   |   |
| 250 | 320 | R | -1.505677 | X |   | X |   |
| 251 | 321 | G | -0.107283 |   |   |   |   |
| 252 | 322 | N | 3.569661  |   |   |   |   |
| 253 | 323 | V | -0.05815  |   |   |   |   |
| 254 | 324 | C | 1.009454  |   |   |   |   |
| 255 | 325 | G | 0.090486  | + |   |   |   |
| 256 | 326 | D | -0.909612 | + |   |   |   |
| 257 | 327 | A | 0.406681  |   |   |   |   |
| 258 | 328 | K | -0.126022 |   |   |   |   |
| 259 | 329 | N | 0.991661  | + |   |   |   |
| 260 | 330 | D | -2.244403 |   |   |   |   |
| 261 | 331 | P | -0.540567 |   |   |   |   |
| 262 | 332 | P | -1.283243 |   |   |   |   |
| 333 | K   |   |           |   |   |   |   |
| 334 | G   |   |           |   |   |   |   |
| 335 | C   |   |           |   |   |   |   |
| 336 | A   |   |           |   |   |   |   |
| 263 | 337 | S | 1.03916   |   |   |   |   |
| 264 | 338 | F | -0.12264  |   |   |   |   |
| 265 | 339 | N | 1.517085  |   |   |   |   |
| 266 | 340 | A | -0.502112 |   |   |   |   |
| 267 | 341 | T | -0.232803 |   |   |   |   |
| 268 | 342 | V | -0.52675  |   |   |   |   |
| 269 | 343 | I | -0.621645 |   |   |   |   |
| 270 | 344 | V | 0.297644  |   |   |   |   |
| 271 | 345 | L | 0.27731   |   |   |   |   |
| 272 | 346 | N | -0.569129 |   |   |   |   |
| 273 | 347 | H | -0.642506 |   |   |   |   |
| 274 | 348 | P | -0.085116 |   |   |   |   |
| 275 | 349 | G | -0.42456  |   |   |   |   |
| 276 | 350 | Q | 0.526973  |   |   |   |   |
| 277 | 351 | I | -0.681988 |   |   |   |   |
| 278 | 352 | S | 3.431352  | + |   |   |   |
| 279 | 353 | A | -2.932843 |   |   |   |   |
| 280 | 354 | G | -0.056817 |   |   | X |   |
| 281 | 355 | Y | -0.124444 |   |   | X |   |
| 282 | 356 | S | 0.568355  |   |   | X | X |
| 283 | 357 | P | -0.085116 |   |   | X |   |
| 284 | 358 | V | -0.480202 |   |   |   |   |
| 285 | 359 | L | 0.316934  |   |   | X | X |
| 286 | 360 | D | -0.640615 | + | X | X | X |
| 287 | 361 | C | -0.016896 | + |   | X | X |
| 288 | 362 | H | -0.071791 | + |   | X | X |
| 289 | 363 | T | -0.660148 |   | X | X | X |
| 290 | 364 | A | 0.212576  |   |   |   |   |
| 291 | 365 | H | -0.595638 |   | X | X | X |
| 292 | 366 | I | -0.889554 |   |   |   |   |
| 293 | 367 | A | -0.506449 |   |   | X | X |
| 294 | 368 | C | 1.912773  |   |   |   |   |
| 295 | 369 | R | -0.015582 |   |   |   |   |
| 296 | 370 | F | -0.977885 |   |   |   |   |
| 297 | 371 | D | 3.408905  | + |   |   |   |
| 372 | E   |   |           |   |   |   |   |
| 373 | L   |   |           |   |   |   |   |
| 374 | L   |   |           |   |   | X |   |
| 375 | E   |   |           |   |   |   |   |
| 376 | K   |   |           |   |   |   |   |
| 377 | N   |   |           |   |   |   |   |
| 378 | D   |   |           |   |   |   |   |
| 379 | R   |   |           |   |   |   |   |
| 380 | R   |   |           |   |   |   |   |
| 381 | S   |   |           |   |   |   |   |
| 382 | G   |   |           |   |   |   |   |
| 383 | K   |   |           |   |   |   |   |
| 384 | K   |   |           |   |   |   |   |
| 385 | L   |   |           |   |   |   |   |
| 386 | E   |   |           |   |   |   |   |
| 387 | D   |   |           |   |   |   |   |
| 298 | 388 | H | 0.249567  |   |   |   |   |
| 299 | 389 | P | -0.467942 |   |   |   |   |

|     |     |   |           |   |   |   |   |
|-----|-----|---|-----------|---|---|---|---|
| 300 | 390 | K | -0.045764 |   |   |   |   |
| 301 | 391 | F | 0.882069  |   |   |   |   |
| 302 | 392 | L | 1.004957  |   |   |   |   |
| 303 | 393 | K | 0.274305  |   |   |   |   |
| 304 | 394 | S | 0.424135  |   |   |   |   |
| 305 | 395 | G | -0.346981 |   |   |   |   |
| 306 | 396 | D | -0.499211 |   |   |   |   |
| 307 | 397 | A | -0.38534  |   |   |   |   |
| 308 | 398 | A | 1.122003  | + |   |   |   |
| 309 | 399 | L | 0.200305  |   |   |   |   |
| 310 | 400 | V | -1.146828 |   |   |   |   |
| 311 | 401 | K | 1.224005  |   |   |   |   |
| 312 | 402 | F | 0.699311  |   |   |   |   |
| 313 | 403 | V | 0.50987   |   |   |   |   |
| 314 | 404 | P | -0.50339  |   |   |   |   |
| 315 | 405 | S | 0.337358  |   |   | X | X |
| 316 | 406 | K | -0.623663 |   |   | X |   |
| 317 | 407 | P | -0.378009 |   |   |   |   |
| 318 | 408 | M | -0.533137 |   |   |   |   |
| 319 | 409 | C | 0.473041  |   |   |   |   |
| 320 | 410 | V | -0.702978 |   |   |   |   |
| 321 | 411 | E | -0.63531  |   |   |   |   |
| 322 | 412 | A | 0.314541  |   |   |   |   |
| 323 | 413 | F | -0.256736 |   |   |   |   |
| 324 | 414 | S | 0.73866   |   |   |   |   |
| 325 | 415 | E | 0.327665  |   |   |   |   |
| 326 | 416 | Y | -0.598076 |   |   |   |   |
| 327 | 417 | P | 0.221699  |   |   |   |   |
| 328 | 418 | P | -0.778825 |   |   |   |   |
| 329 | 419 | L | -0.584079 |   |   |   |   |
| 330 | 420 | G | -0.610406 |   |   |   |   |
| 331 | 421 | R | -0.574403 |   |   |   |   |
| 332 | 422 | F | -0.656284 |   |   |   |   |
| 333 | 423 | A | -0.623721 |   |   |   |   |
| 334 | 424 | V | -0.909174 |   |   |   | X |
| 335 | 425 | R | -0.710177 |   | X |   | X |
|     | 426 | D |           |   |   | X |   |
|     | 427 | M |           |   | X | X |   |
|     | 428 | R |           |   |   | X |   |
|     | 429 | Q |           |   |   |   |   |
|     | 430 | T |           |   |   |   |   |
|     | 431 | V |           |   |   |   |   |
|     | 432 | A |           |   |   |   |   |
|     | 433 | V |           |   |   |   |   |
|     | 434 | G |           |   |   |   |   |
|     | 435 | V |           |   |   |   |   |
|     | 436 | I |           |   |   |   |   |
|     | 437 | K |           |   |   |   |   |
|     | 438 | S |           |   |   |   |   |
|     | 439 | V |           |   |   |   |   |
|     | 440 | D |           |   |   |   |   |
|     | 441 | K |           |   |   |   |   |
