# Supplementary material
Source: PubMed Central journal article supplement (PMC524445)
Supplement: pnas_101_43_15380__2.pdf [file pnas_101_43_15380__2.pdf]

341 350 360 370 380 390 400 410 420 425

eEF Giardia intestinalis  
eEF Trichomonas tenax  
eEF Leishmania braziliensis  
eEF Euglena gracilis  
eEF Tetrahymena pyriformis  
eEF Plasmodium falciparum  
eEF Rhodomonas salina  
eEF Phytophthora infestans  
eEF Cyanidioschyzon merolae  
eEF Acetabularia acetabulum  
eEF Arabidopsis thaliana  
eEF Oryza sativa  
eEF Entamoeba histolytica  
eEF Homo sapiens  
eEF Glugea plectoglossi  
eEF Saccharomyces cerevisiae  
eEF Mucor racemosus  
EFL Chlamydomonas reinhardtii  
EFL Scenedesmus obliquus  
EFL Pleodorina sp.  
EFL Prototheca wickerhamii  
EFL Helicosporidium sp.  
EFL Conidiobolus coronatus  
EFL Heterodera glycines  
EFL Monosiga brevicollis  
EFL 43259336 environmental  
EFL Isochrysis galbana  
EFL Pavlova lutheri  
EFL Heterocapsa triquetra  
EFL Amphidinium carterae  
EFL Lingulodinium polyedrum  
EFL Bigelowiella natans  
eRF Saccharomyces cerevisiae  
eRF Homo sapiens  
eRF Nicotiana tobacum  
HBS1 Saccharomyces cerevisiae  
HBS1 Homo sapiens  
HBS1 Arabidopsis thaliana  
aEF Termoplasma acidophilum  
aEF Sulfolobus sulfataricus

426 430 440 450 460 470 480 490 500 510

eEF Giardia intestinalis  
eEF Trichomonas tenax  
eEF Leishmania braziliensis  
eEF Euglena gracilis  
eEF Tetrahymena pyriformis  
eEF Plasmodium falciparum  
eEF Rhodomonas salina  
eEF Phytophthora infestans  
eEF Cyanidioschyzon merolae  
eEF Acetabularia acetabulum  
eEF Arabidopsis thaliana  
eEF Oryza sativa  
eEF Entamoeba histolytica  
eEF Homo sapiens  
eEF Glugea plectoglossi  
eEF Saccharomyces cerevisiae  
eEF Mucor racemosus  
EFL Chlamydomonas reinhardtii  
EFL Scenedesmus obliquus  
EFL Pleodorina sp.  
EFL Prototheca wickerhamii  
EFL Helicosporidium sp.  
EFL Conidiobolus coronatus  
EFL Heterodera glycines  
EFL Monosiga brevicollis  
EFL 43259336 environmental  
EFL Isochrysis galbana  
EFL Pavlova lutheri  
EFL Heterocapsa triquetra  
EFL Amphidinium carterae  
EFL Lingulodinium polyedrum  
EFL Bigelowiella natans  
eRF Saccharomyces cerevisiae  
eRF Homo sapiens  
eRF Nicotiana tobacum  
HBS1 Saccharomyces cerevisiae  
HBS1 Homo sapiens  
HBS1 Arabidopsis thaliana  
aEF Termoplasma acidophilum  
aEF Sulfolobus sulfataricus
